# Supplementary material
Source: Springer Nature journal article supplement (https://www.springermedizin.de/resource/supplementary/12882_2014_796_MOESM2_ESM.pdf/9454324)
Supplement: MOESM2 [file 9454324]

| Category<br>(Circle One)              | Description<br>(Check all that apply)                                                                                                                  |
|---------------------------------------|--------------------------------------------------------------------------------------------------------------------------------------------------------|
| Pre-renal<br>Azotemia                 | <input type="checkbox"/> <input type="checkbox"/> Pattern and kinetics of blood creatinine's rise and fall during AKI episode.                         |
|                                       | <input type="checkbox"/> <input type="checkbox"/> Negative fluid balance                                                                               |
|                                       | <input type="checkbox"/> <input type="checkbox"/> Other: Please print a description:                                                                   |
| Acute<br>Tubular<br>Necrosis<br>(ATN) | <b>Ischemic</b>                                                                                                                                        |
|                                       | <input type="checkbox"/> <input type="checkbox"/> Pattern and kinetics of blood creatinine's rise and fall during AKI episode                          |
|                                       | <input type="checkbox"/> <input type="checkbox"/> Hypotension and its management around the time of the AKI episode                                    |
|                                       | <input type="checkbox"/> <input type="checkbox"/> CPB time                                                                                             |
|                                       | <input type="checkbox"/> <input type="checkbox"/> Other: Please print a description:                                                                   |
|                                       | <b>Nephrotoxic</b>                                                                                                                                     |
|                                       | <input type="checkbox"/> <input type="checkbox"/> Use of contrast agent                                                                                |
|                                       | <input type="checkbox"/> <input type="checkbox"/> Use of NSAID<br><input type="checkbox"/> <input type="checkbox"/> Other: Please print a description: |
| Indeterminate                         | <input type="checkbox"/> <input type="checkbox"/> Please provide reason(s):                                                                            |
